# Supplementary figures and images for: Comprehensive bioinformation analysis of methylated and differentially expressed genes in esophageal squamous cell carcinoma
Source: Royal Society of Chemistry journal article supplement (doi:10.1039/c8mo00218e), 2019-01-24

## GEO database

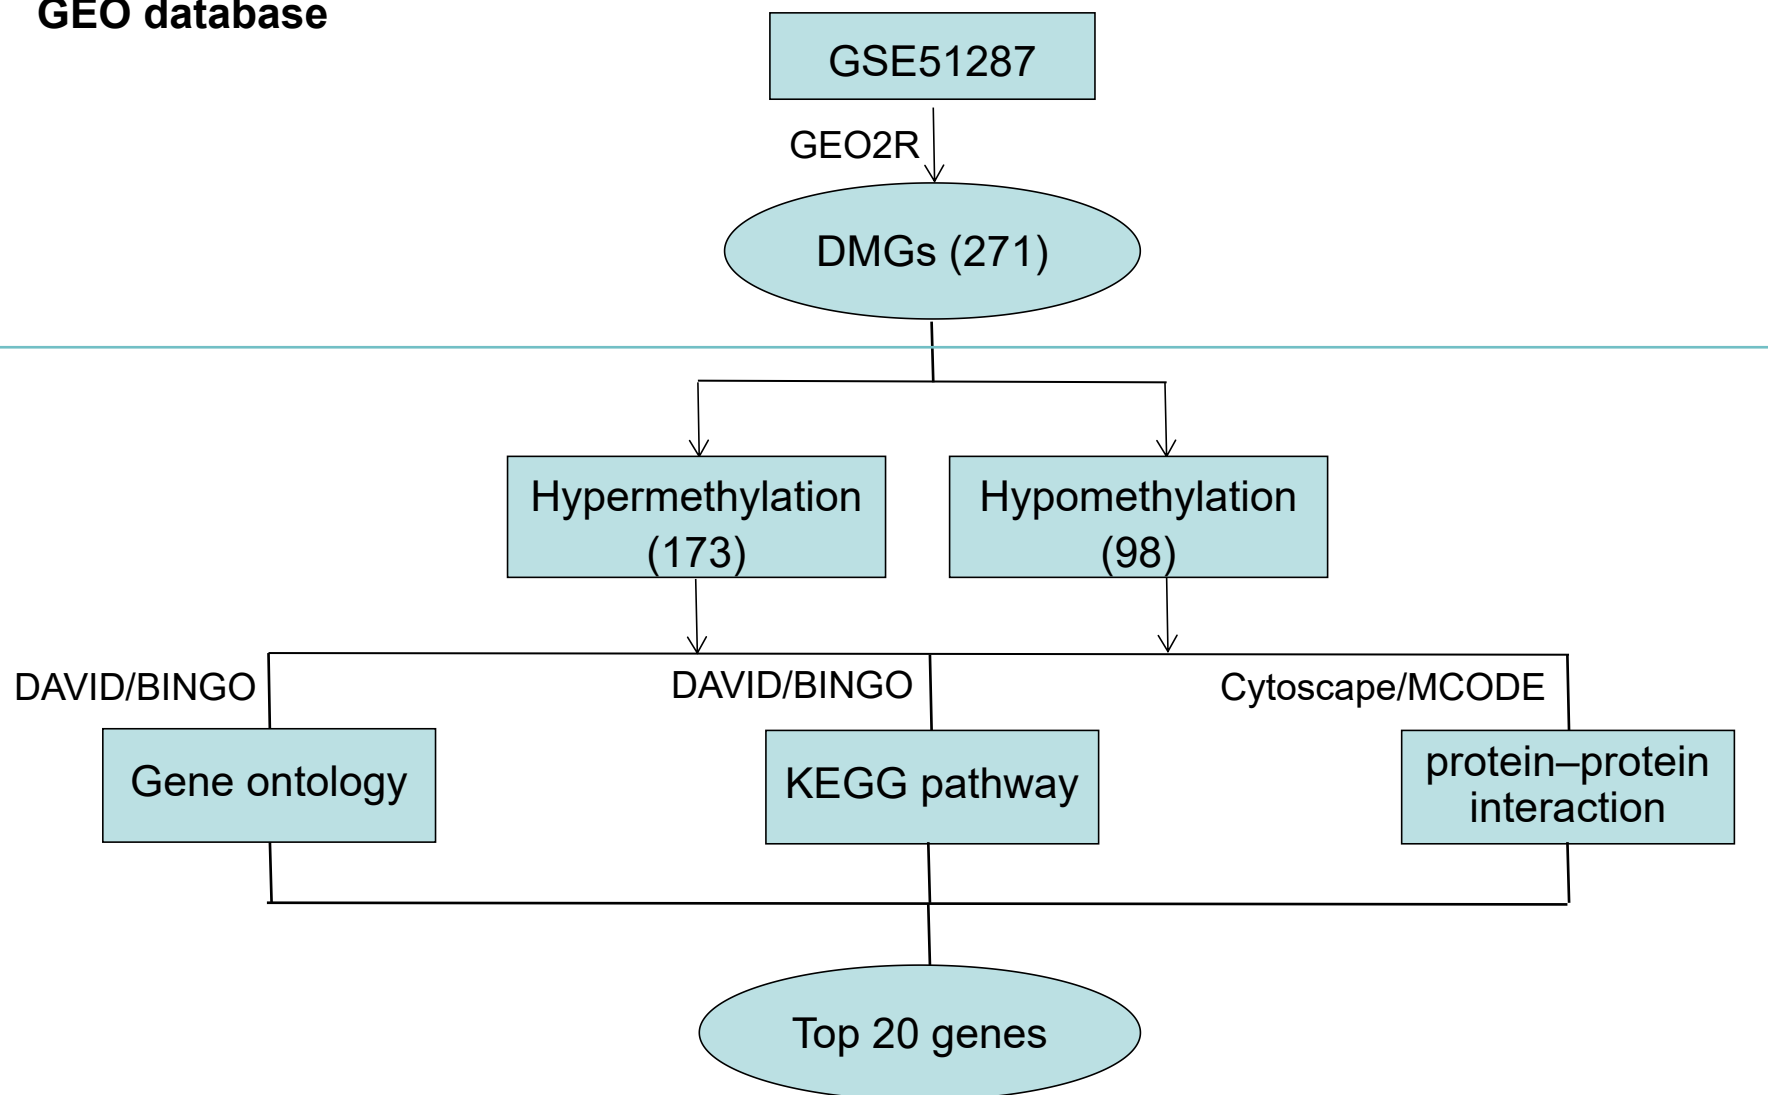

## TCGA database

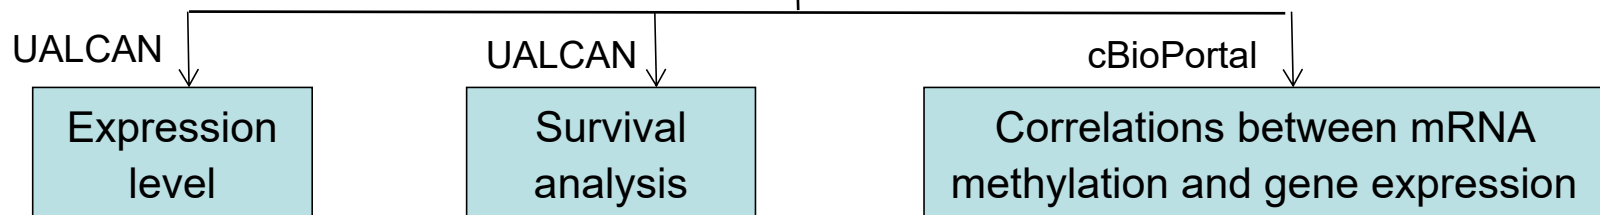

Supplement: c8mo00218e1.pdf [file c8mo00218e1.pdf]
